# Supplementary material
Source: Research Square preprint supplement (doi:10.21203/rs.3.rs-8923591/v1)
Supplement: Supplementary file 1 [file c9ae36f1b1878782193e7bb4.xlsx]

## Sheet: Sheet1
Accession Number
AB545151
AB684681
AB983218
AY502009
DQ438972
GQ266696
GQ266697
PV920384
PV920383
PV920382
PV920381
PV920380
PV920379
PV920378
PV920377
PV920376
PV920375
PV920374
PV920373
PV920372
PV920371
PV920370
PV920369
PV920368
PV920367
JF970609
KC597139
KJ156329
KJ196286
KP698928
KP698929
KP698930
KP698931
KP864102
KP864103
KP864104
KP902563
KP902564
KP902565
KP902566
KP902567
KP902568
KP902569
KP902570
KP902571
KP902572
KP902573
KP902574
KP902575
KP902576
KP902577
KP902578
KP902579
KP902580
KP902581
KP902582
KP902583
KP902584
KP902585
KP902586
KP902587
KP902588
KP902589
KP902590
KP994317
KP994318
KP998539
KR020503
KR052019
KR052020
KR052021
KR052022
KR083017
KR154230
KR154231
KR270442
KR270443
KR270444
KR270445
KR270446
KR270447
KR270448
KR270449
KR858308
KT149168
KT149169
KT149170
KT149172
KT149173
KT149174
KT149175
KT149176
KT253245
KT285173
KT315669
KT315670
KT315671
KT315672
KT315673
KT315674
KT315675
KT315676
KT315677
KT315678
KT315679
KT315680
KT315681
KT315682
KT315683
KT315684
KT315685
KT315686
KT315687
KT315688
KT315689
KT315690
KT315691
KT315692
KT315693
KT315694
KT315695
KT315697
KT315698
KT315699
KT315700
KT315702
KT315703
KT315704
KT315705
KT315706
KT315707
KT315708
KT315709
KT315710
KT315712
KT315713
KT315714
KT315715
KT315716
KT315717
KT315718
KT315719
KT326180
KT326181
KT326182
KT346356
KT346358
KT380915
KT589391
KT591501
KT732275
KT732276
KT780394
KT780395
KT780396
KT780397
KT780398
KT780399
KT780400
KT780401
KT780402
KT780403
KT780404
KT780405
KT780406
KT780407
KT780408
KT780409
KT780410
KT780411
KT780412
KT780413
KT780414
KT780415
KT780416
KT864684
KT864685
KT864686
KT864687
KT906669
KT906670
KT906671
KT970369
KT970370
KT970371
KT970372
KT970373
KT970374
KT970375
KT970376
KT970377
KT992785
KT992786
KT992787
KT992788
KT992789
KT992790
KU555841
KU557783
KU557784
KU557785
KU557786
KU557787
KU557788
KU557789
KU557790
KU557791
KU557792
KU557793
KU557794
KU557795
KU557796
KU557797
KU557798
KU557799
KU557800
KU557801
KU557802
KU557803
KU557804
KU557805
KU557806
KU557807
KU557808
KU557809
KU557810
KU557811
KU557812
KU557813
KU557814
KU557815
KU557816
KU557817
KU557818
KU557819
KU557820
KU557821
KU557822
KU557823
KU557824
KU557825
KU557826
KU557827
KU557828
KU557829
KU557830
KU557831
KU557832
KU557833
KU557834
KU557835
KU557836
KU557837
KU557838
KU557839
KU557840
KU557841
KU557842
KU557843
KU557844
KU557845
KU557846
KU557847
KU557848
KU557849
KU557850
KU557851
KU557852
KU557853
KU557854
KU557855
KU557856
KU557857
KU557858
KU557859
KU557860
KU557861
KU557862
KU557863
KU557864
KU557865
KU557866
KU557867
KU557868
KU557869
KU557870
KU557871
KU557872
KU557873
KU557874
KU557875
KU557876
KU557877
KU557878
KU557879
KU557880
KU557881
KU557882
KU557883
KU557884
KU557885
KU557886
KU557887
KU557888
KU557889
KU557890
KU557891
KU557892
KU557893
KU561224
KU561225
KU561226
KU561227
KU561228
KU561229
KU561230
KU561231
KU561232
KU561233
KU561234
KU561235
KU561236
KU561237
KU561238
KU561239
KU561240
KU561241
KU561242
KU561243
KU561244
KU561245
KU561246
KU561247
KU561248
KU561249
KU561250
KU561251
KU561252
KU561253
KU561254
KU561255
KU561256
KU587625
KU587626
KU587627
KU587628
KU587629
KU687013
KU687015
KU687016
KU757046
KU757047
KU757048
KU757049
KU757050
KU757051
KU757052
KU757053
KU757054
KU953391
KU953392
KU953393
KU953394
KU953395
KU953396
KU953397
KU953398
KX024652
KX134669
KX134670
KX134671
KX168437
KX168438
KX168439
KX168440
KX168441
KX168442
KX168443
KX168444
KX168445
KX168446
KX168447
KX168448
KX168449
KX168450
KX168451
KX168452
KX168453
KX168454
KX168455
KX168456
KX171412
KX171413
KX171414
KX171415
KX171416
KX171417
KX171418
KX171419
KX216782
KX216783
KX216784
KX216785
KX216786
KX216788
KX216789
KX216790
KX216791
KX216792
KX216793
KX216794
KX216795
KX216796
KX216797
KX216798
KX216799
KX216800
KX216801
KX216802
KX216803
KX216804
KX216805
KX216806
KX244850
KX244851
KX244852
KX244853
KX244854
KX346699
KX346700
KX346701
KX346702
KX346703
KX346704
KX346705
KX356908
KX371107
KX371108
KX371109
KX371110
KX371111
KX371112
KX420891
KX420892
KX420893
KX420894
KX420895
KX424646
KX424647
KX424648
KX424649
KX424650
KX592170
KX592171
KX592172
KX764836
KX764837
KX764838
KX764839
KX764840
KX764841
KX764842
KX764843
KX764844
KX764845
KX989474
KX989475
KX989476
KX989477
KX989478
KY069114
KY069115
KY392867
KY392868
KY397953
KY397954
KY397955
KY397956
KY397957
KY397958
KY406954
KY406955
KY406956
KY406957
KY406958
KY406959
KY406960
KY406961
KY406962
KY406963
KY406964
KY406965
KY406966
KY406967
KY406968
KY406969
KY406970
KY406971
KY406972
KY406973
KY406974
KY406975
KY406976
KY406977
KY406978
KY406979
KY406980
KY406981
KY407181
KY407182
KY407183
KY407184
KY407185
KY407186
KY407203
KY407204
KY407205
KY407206
KY424349
KY424350
KY502252
KY905330
KY905332
LC037415
LC043139
LC043167
LC043168
LC043305
LC101778
LC101779
LC101780
LC101781
LC101782
LC101783
LC101784
LC101788
LC101820
LC148844
LC148845
LC148846
LC148847
LC148848
LC148849
LC148850
LC148851
LC148852
LC148853
LC148854
LC148855
LC148856
LC177662
LC258403
LC311767
LC311768
LC311769
LC311770
LC311771
LC311772
LC311773
LC318745
LC318746
LC318747
LC318748
LC318750
LC318751
LC318752
LC318753
LC318754
LC318755
LC318756
LC318757
LC318758
LC333866
LC333867
LC333868
LC333869
LC333870
LC333871
LC333872
LC333873
LC333874
LC333875
LC333876
LC333877
LC333878
LC333879
LC333880
LC333881
LC333882
LC333883
LC333884
LC333885
LC333886
LC333887
LC333888
LC333889
LC333890
LC333891
LC333892
LC333893
LC333894
LC333895
LC333896
LC333897
LC333898
LC333899
LC333900
LC333901
LC349986
LC349987
LC349988
LC349989
LC349990
LC349991
LC349992
LC349993
LC369214
LC369215
LC369216
LC369217
LC369218
LC369219
LC369220
LC369221
LC369222
LC369224
LC369225
LC369227
LC369228
LC369229
LC369230
LC369231
LC369232
LC369233
LC369234
LC369235
LC369236
LC369237
LC369238
LC369239
LC369240
LC369241
LC369242
LC369243
LC369244
LC369245
LC369246
LC369247
LC369248
LC369249
LC369251
LC369252
LC369253
LC369254
LC369255
LC369256
LC369257
LC369258
LC433694
LC433695
LC433696
LC433698
LC433699
LC433709
LC433710
LC433711
LC433712
LC433713
LC433716
LC433718
LC433719
LC433720
LC433721
LC433722
LC433723
LC433724
LC433726
LC433727
LC433729
LC433730
LC433731
LC433732
LC433733
LC433734
LC433735
LC433736
LC486737
LC486738
LC486739
LC486740
LC486741
LC486742
LC486743
LC486744
LC486745
LC486746
LC486747
LC486748
LC486749
LC486750
LC486751
LC486752
LC486753
LC486754
LC486755
LC486756
LC486757
LC486758
LC486759
LC486760
LC486761
LC486762
LC486763
LC486764
LC486765
LC486766
LC486767
LC486768
LC486769
LC486770
LC597112
LC644992
LC769700
LC848162
LC848165
LC848172
LC868426
LC868427
LC868428
LC868429
LC868430
LC868431
LC868432
LC868433
LC868434
LC868435
LC868436
LC868437
LC868438
MF073239
MF073240
MF073241
MF073242
MF073243
MF073244
MF073245
MF073246
MF073247
MF073248
MF073249
MF073250
MF073251
MF073252
MF073253
MF073254
MF172092
MF172093
MF172094
MF172095
MF172096
MF421538
MF421539
MF421540
MF421541
MF421542
MF918359
MG692610
MG995040
MH218591
MH218689
MH375799
MH375801
MH375802
MH375803
MH375804
MH375805
MH375806
MH375808
MH375809
MH375810
MH375811
MH375812
MH375813
MH375814
MH572223
MH572224
MH572225
MH572226
MH572227
MH572228
MH572229
MH572230
MH572231
MH572232
MH608288
MH638230
MH746922
MH746923
MH746924
MH746925
MH747479
MH747480
MH747481
MH747482
MH890538
MH890539
MH997861
MK077684
MK077685
MK077686
MK077687
MK077688
MK077689
MK077690
MK077691
MK077692
MK077693
MK077694
MK077695
MK077696
MK077697
MK077698
MK077699
MK077700
MK077701
MK077702
MK077703
MK077704
MK077705
MK077706
MK077707
MK077708
MK077709
MK077710
MK077711
MK077712
MK077713
MK077714
MK166053
MK166054
MK166055
MK166056
MK166057
MK166058
MK166059
MK166060
MK282256
MK282257
MK282258
MK396775
MK648241
MK648242
MK789431
MK789432
MK789433
MK907790
MK907791
MK907792
MK907793
MK907800
MK907801
MN045191
MN045192
MN045193
MN045194
MN045195
MN045196
MN045197
MN045198
MN045199
MN045200
MN045203
MN394546
MN502813
MN502825
MN502842
MN502844
MN502845
MN502848
MN502861
MN502873
MN502877
MN502879
MN502884
MN502888
MN502896
MN502910
MN502943
MN502946
MN502950
MN502951
MN502956
MN502963
MN502969
MN502972
MN502982
MN502986
MN502999
MN503005
MN503012
MN503019
MN503022
MN503023
MN503027
MN503030
MN503033
MN503034
MN503044
MN503046
MN503048
MN503064
MN503066
MN503068
MN503069
MN503081
MN503084
MN525218
MN853414
MN960578
MN996296
MN996300
MT158860
MT158861
MT233102
MT233268
MT233269
MT238663
MT238664
MT238665
MT238669
MT344181
MT344182
MT371769
MT729791
MW305512
MW305517
MW305582
MW305604
MW305607
MW305609
MW305610
MW305625
MW305654
MW305659
MW305660
MW305734
MW305742
MW603758
MW661253
MZ026903
MZ026904
MZ026910
MZ026911
MZ026912
MZ026915
MZ026939
MZ026941
MZ026942
MZ026945
MZ026947
MZ026950
MZ026953
MZ026961
MZ026980
MZ026981
MZ026988
MZ026989
MZ026990
MZ026995
MZ027001
MZ027002
MZ027004
MZ027005
MZ027008
MZ027011
MZ027016
MZ027017
MZ027023
MZ027024
MZ027025
MZ027026
MZ027027
MZ027032
MZ027033
MZ027042
MZ027043
MZ027045
MZ027046
MZ027047
MZ027048
MZ279713
MZ279714
MZ279715
MZ291623
MZ291631
MZ291632
MZ478134
NC039475
OL943802
OM480530
ON706297
ON854105
ON854109
ON854110
ON854111
OP205529
OP205532
OP205533
OP205534
OP205535
OP205536
OP205537
OP689689
OP712199
OP805360
OP805361
OP805362
OP805363
OP805364
OQ721907
OR062612
OR062613
OR475165
OR475168
OR475172
OR475174
OR475176
OR475185
OR475187
OR475188
OR475189
OR475191
OR475192
OR685283
OR687156
PP267276
PP267277
PP267278
PP267279
PP267280
PP267281
PP267282
PP267283
PP267284
PP267285
PP267286
PP267287
PP267288
PP267289
PP267290
PP267291
PP267292
PP267293
PP267294
PP267295
PP267296
PP267298
PP381824
PP423019
PP423020
PP580690
PP587392
PP587393
PQ031234
PQ273196
PQ304610
PQ304611
PQ304612
PQ304613
PQ304614
PQ304632
PQ304633
PQ304634
PQ308684
PQ308685
PQ308686
PQ308687
PQ308688
PQ308689
PQ308690
PQ310124
PQ310125
PQ310126
PQ310127
PQ310128
PQ310129
PQ310130
PQ310131
PQ310234
PQ310235
PQ310236
PQ310251
PQ310252
PQ310354
PQ310459
PQ310518
PQ310519
PQ310520
PQ310521
PQ310522
PQ336847
PQ336848
PQ336849
PQ336850
PQ336851
PQ336852
PQ336853
PQ336854
PQ336855
PQ336856
PQ336857
PQ336858
PQ336859
PQ336860
PQ336861
PQ336862
PQ336863
PQ336864
PQ336865
PQ336866
PQ336867
PQ336868
PQ336869
PQ336870
PQ336871
PQ336872
PQ336873
PQ336942
PQ336943
PQ336944
PQ336945
PQ373119
PQ373120
PQ373121
PQ373122
PQ373123
PQ373124
PQ373125
PQ373126
PQ373127
PQ373128
PQ373129
PQ373130
PQ373131
PQ373132
PQ373133
PQ373134
PQ373135
PQ373136
PQ373137
PQ373138
PQ373139
PQ373140
PQ373141
PQ373142
PQ373143
PQ373144
PQ373145
PQ373146
PQ373147
PQ482378
PQ482379
PQ482380
PQ590551
PV258462
PV282515
PV290966
PV394764
PV394769
PV588655
PV588656
PV588657
PV588658
PV588796
PV588797
PV635313
PV655189
PV765564
PV765565
PV765566
PV765567
PV765568
PV765569
PV765570
PV765571
PV765572
PV765573
PV765574
PV765575
PV765576
PV765577
PV765579
PV765580
PV765581
PV765582
PV765583
PV765584
PV765585
PV765586
PV765587
PV765588
PV765589
PV765590
PV766927
PV766928
PV902474
