# Supplementary material
Source: Research Square preprint supplement (doi:10.21203/rs.3.rs-8923591/v1)

**a**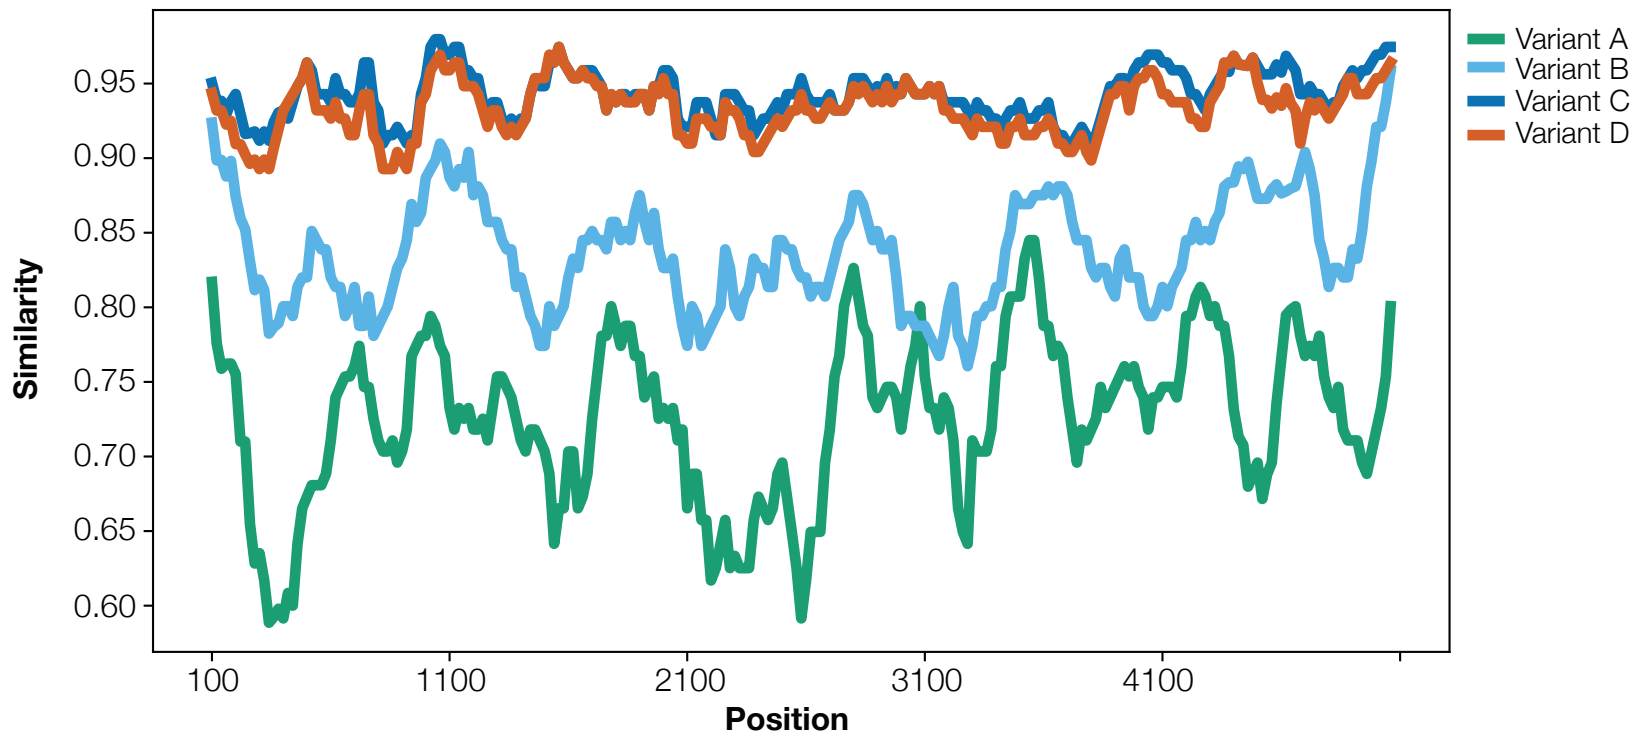**b**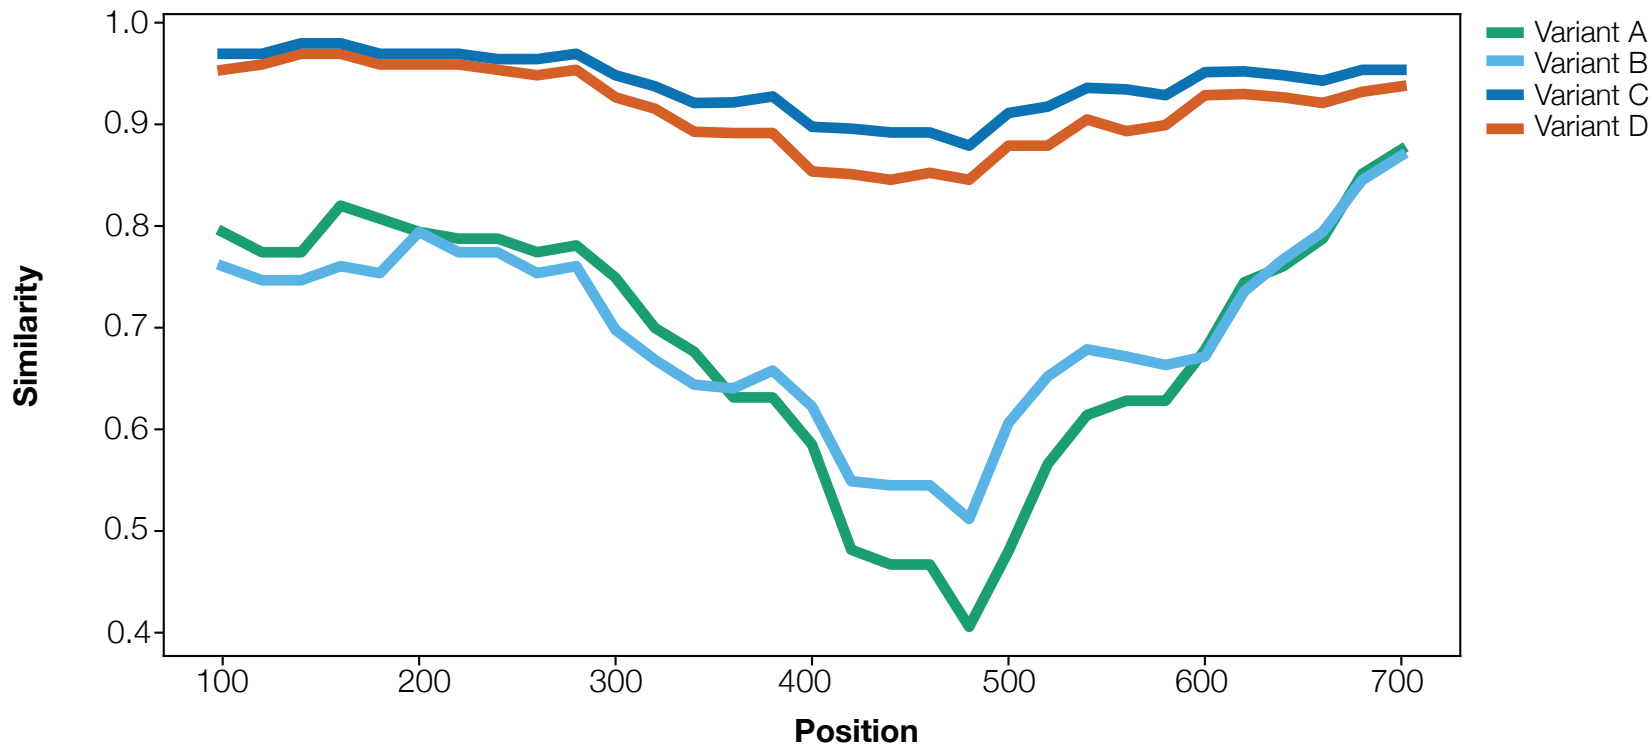

Supplement: Supplementary file 1 [file 08405d27dccaed1d8a7d171b.pdf]

**a**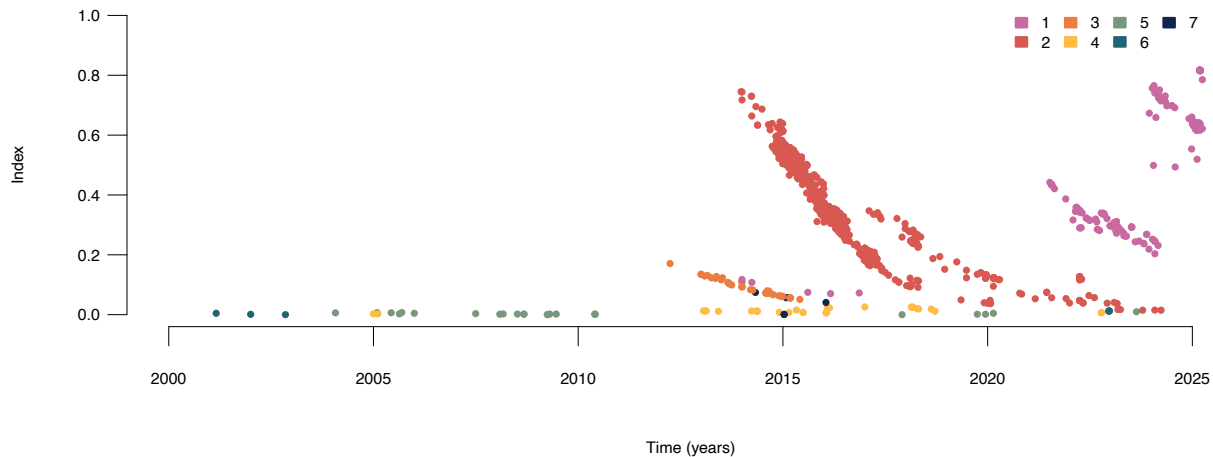**b**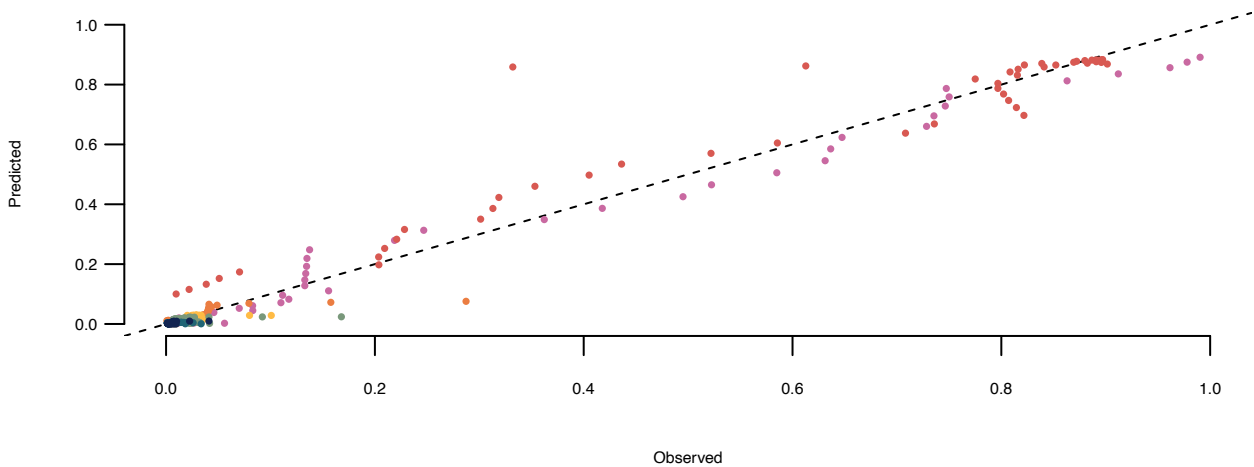

Supplement: Supplementary file 2 [file 47267b58b75b9466f548fd5b.pdf]

**a**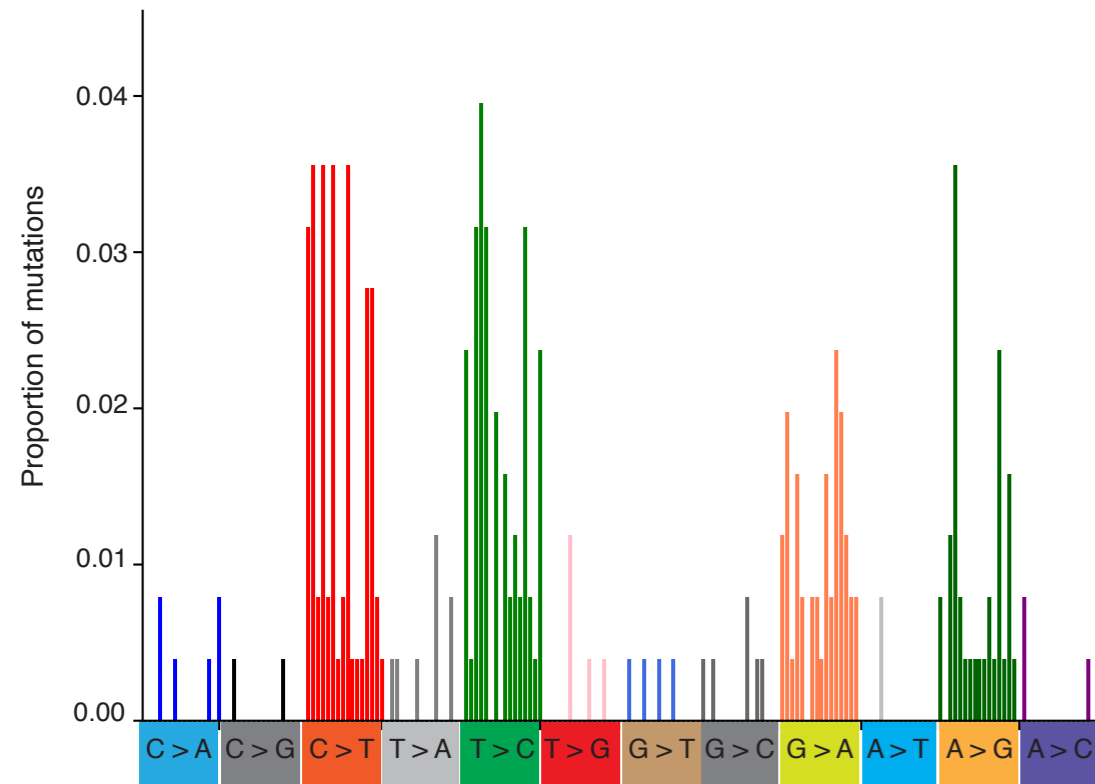**b**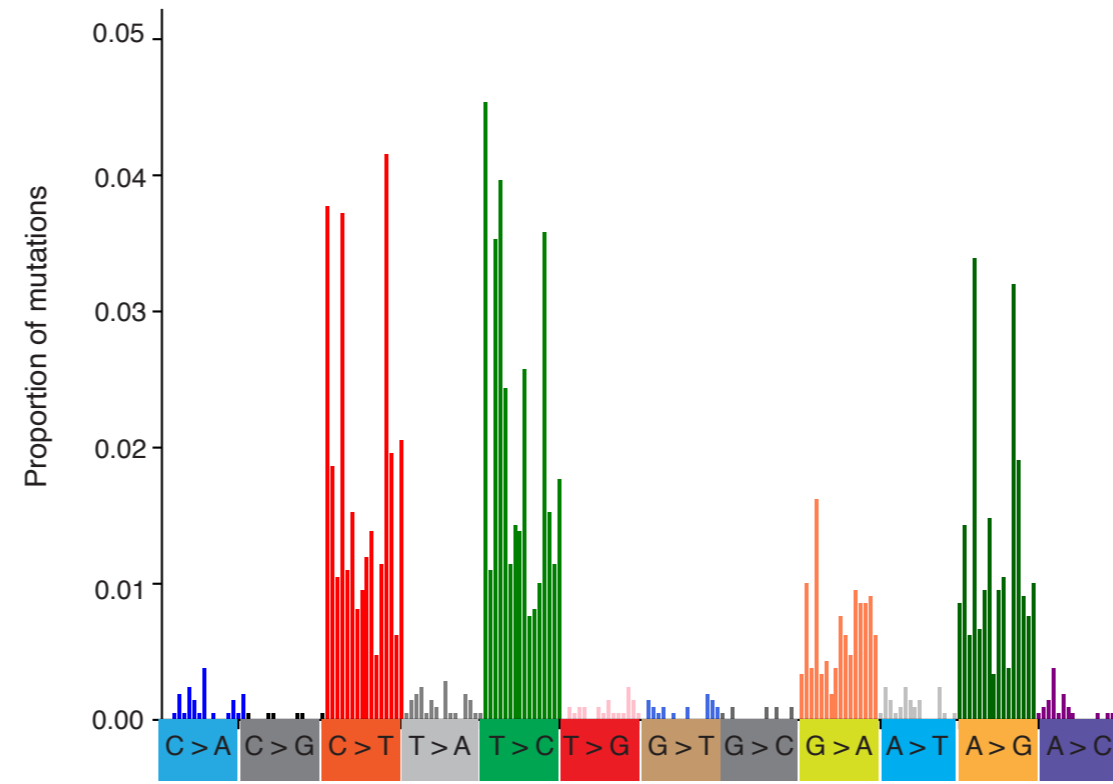**c**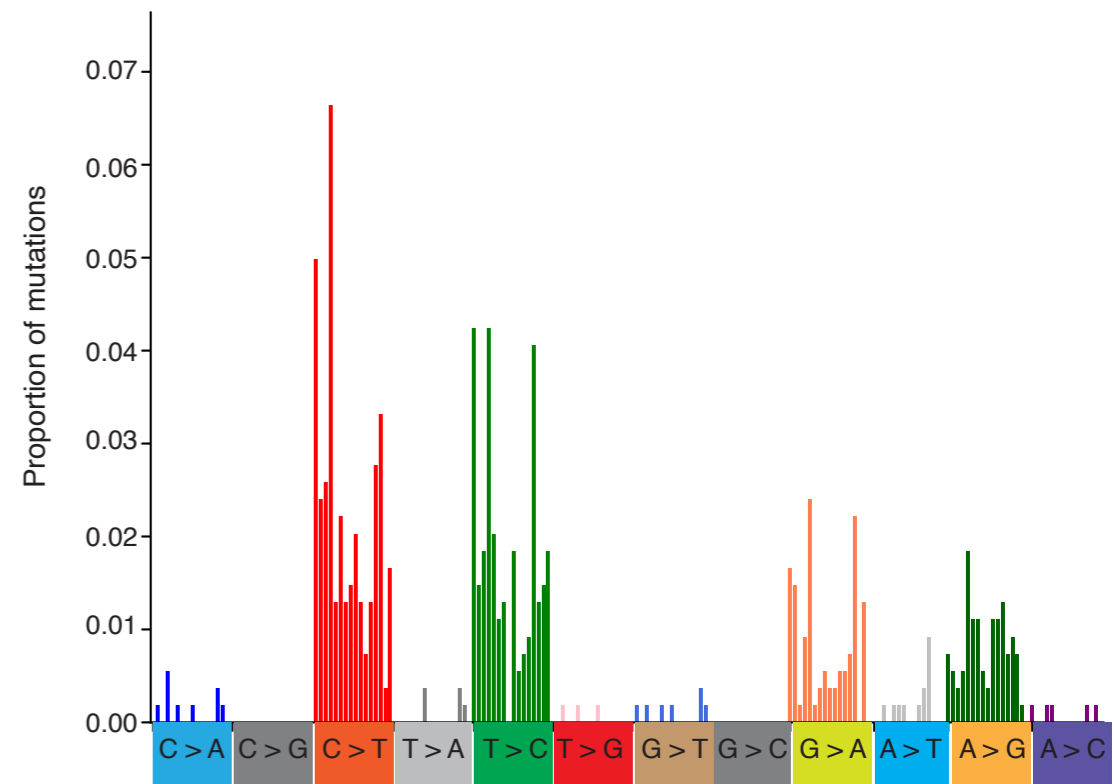

Supplement: Supplementary file 3 [file 8ac0bbde7dc02fe821a1d3e9.pdf]

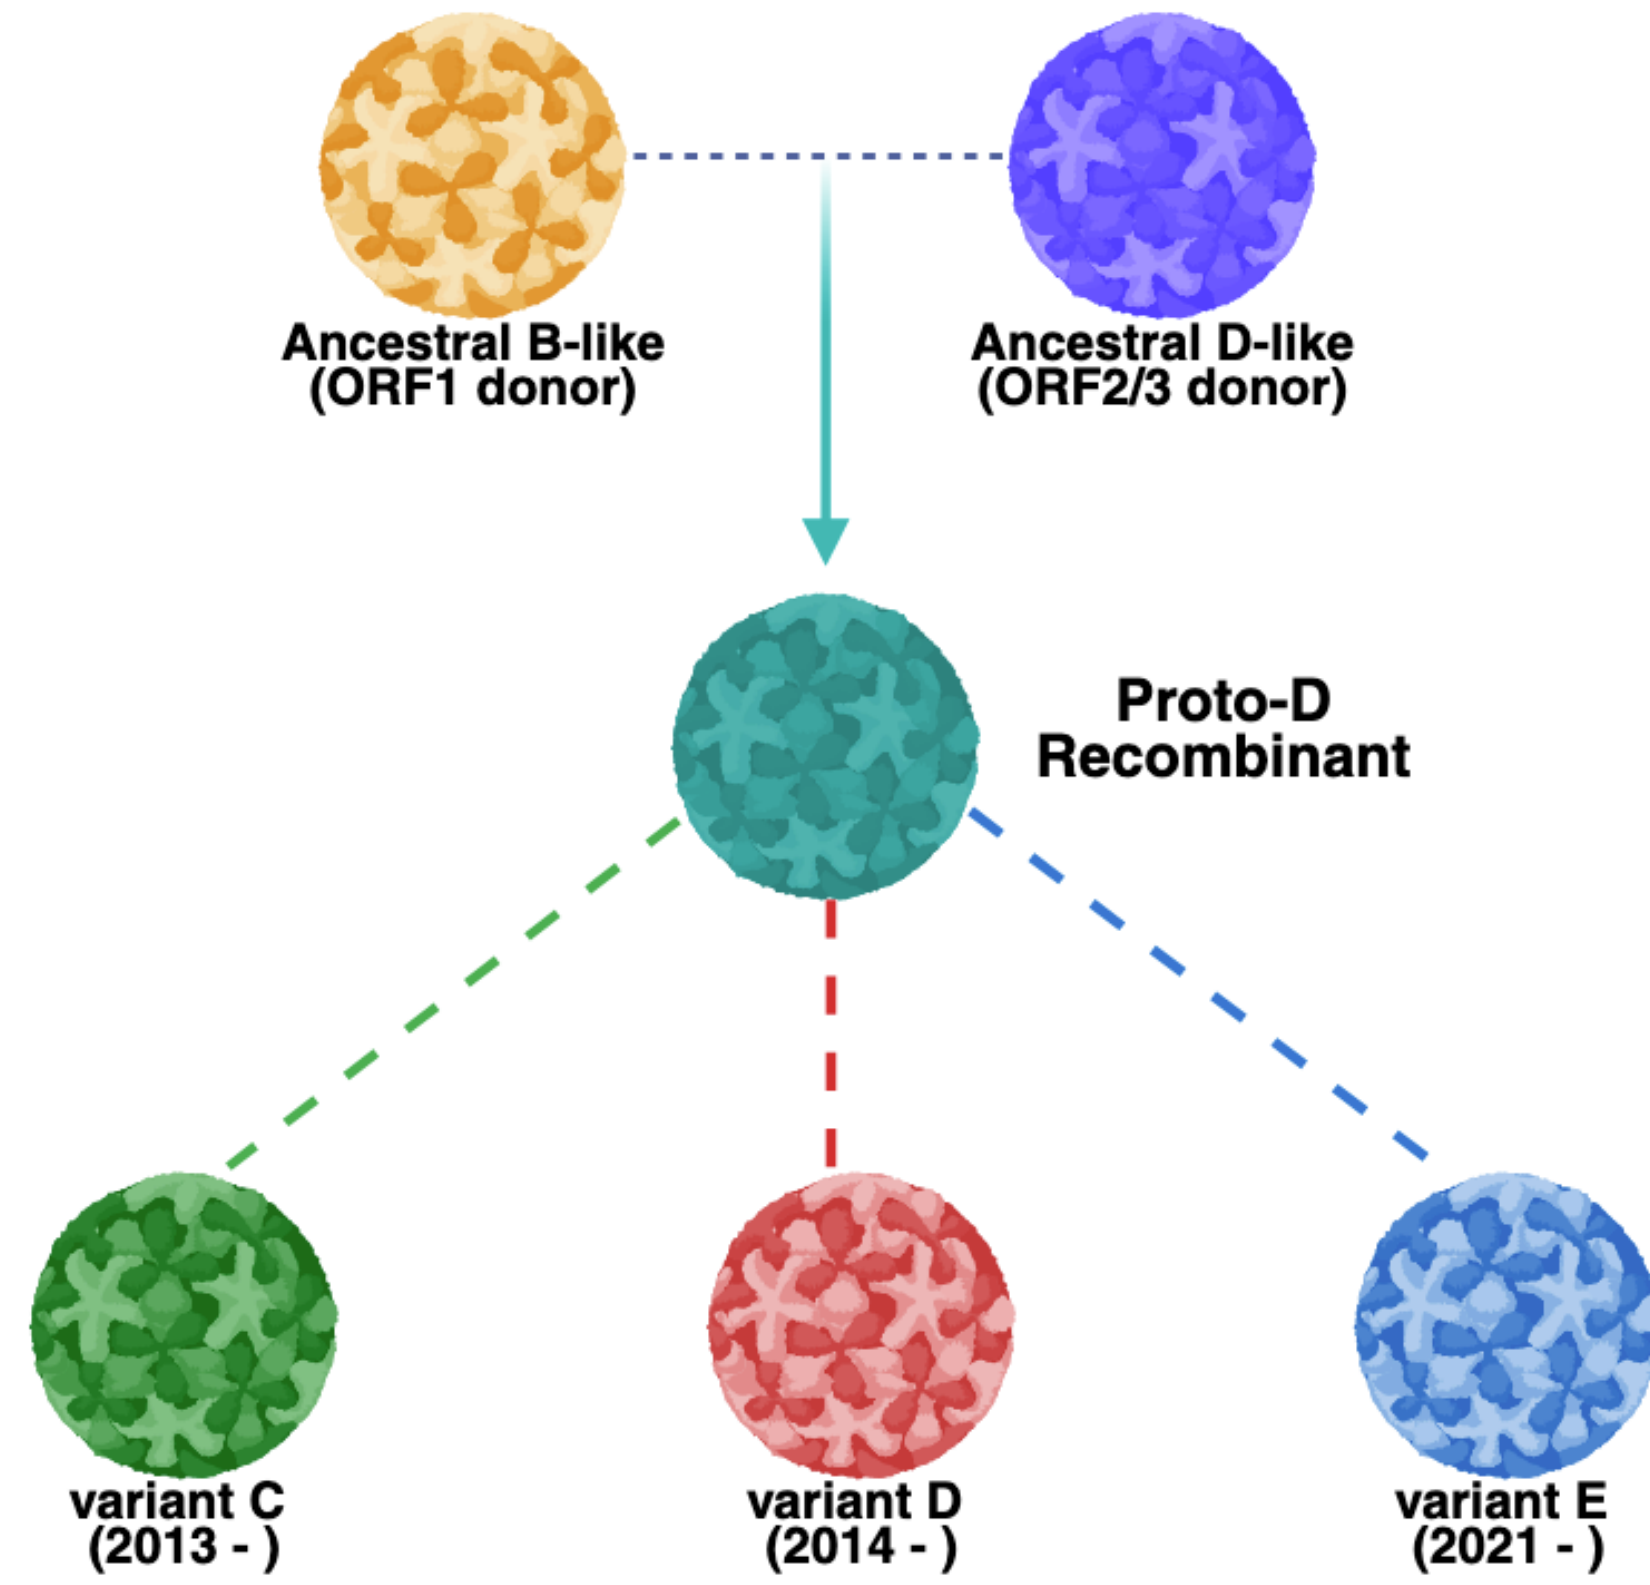

Supplement: Supplementary file 4 [file a593403a69bd4471ee734024.pdf]
